# Supplementary material for: Identification and Analysis of p53-Regulated Enhancers in Hepatic Carcinoma
Source: PubMed Central journal article supplement (PMC7338759; doi:10.3389/fbioe.2020.00668), 2020-06-30
Supplement: Table_6.pdf [file Table_6.pdf]

**Table S6.** Enh<sub>p53</sub> that regulates both miRNA and mRNA

| Enhancer                 | miRNA                                             | Gene                          |
|--------------------------|---------------------------------------------------|-------------------------------|
| chr7:130373756-130374065 | hsa-miR-335-3<br>hsa-miR-29a-3p<br>hsa-miR-29b-3p | KLF14                         |
| chr7:135300381-135315387 | hsa-miR-6509-5p                                   | AGBL3                         |
| chr11:118912202-11891266 | hsa-miR-6716-3p                                   | UPK2 、 ABCG4                  |
| chr16:57893719-57894288  | hsa-miR-6772-3p                                   | ADGRG1、 ADGRG3、<br>CFAP20     |
| chr19:782330-783005      | hsa-miR-4745-5p                                   | MADCAM1、 GZMM、 CFD、<br>ARID3A |
